# Supplementary material for: Synthesis and magnetic properties of 2,2-diphenyl-1,2-dihydroquinoline N -oxyl carrying an ethynyl group at the 5-position
Source: Royal Society of Chemistry journal article supplement (doi:10.1039/d5nj04269k), 2025-12-09
Supplement: d5nj04269k1.pdf [file d5nj04269k1.pdf]

## Supporting Information

# Synthesis and Magnetic Properties of 2,2-Diphenyl-1,2-dihydroquinoline *N*-Oxyl Carrying Ethynyl Group at 5-Position

Masaomi Takii, Fumiteru Nishiura, Masaru Yao, Hidenari Inoue, Youhei Miura, and Naoki Yoshioka\*

*Department of Applied Chemistry, Faculty of Science and Technology, Keio University, Yokohama 223-8522, Japan*

E-mail: yoshioka@applc.keio.ac.jp

### Table of contents

|                                                     |    |
|-----------------------------------------------------|----|
| General methods .....                               | 2  |
| Experimental details .....                          | 3  |
| EPR simulation parameters .....                     | 6  |
| UV-vis measurement .....                            | 7  |
| Cyclic voltammetry .....                            | 8  |
| Crystallographic parameter .....                    | 9  |
| IR spectra .....                                    | 10 |
| Orbital energy level .....                          | 11 |
| Distribution of spin density .....                  | 13 |
| Magnetic interaction .....                          | 16 |
| <sup>1</sup> H and <sup>13</sup> C NMR charts ..... | 19 |
| References .....                                    | 24 |

## General methods

All commercially available chemical compounds were used without further purification unless otherwise noted. The  $^1\text{H}$  and  $^{13}\text{C}$  NMR spectra were recorded on a JNM-ECA500 (500 MHz), JEOL JNM-ECS-400 (400 MHz), or JEOL JNM-ECZ-400 (400 MHz) NMR spectrometer, and the chemical shifts are given in parts per million (ppm) relative to tetramethylsilane ( $\delta = 0.00$  ppm). The elemental analyses were carried out at the Central Laboratory of the Faculty of Science and Technology, Keio University. The X-ray diffraction data were collected by a Bruker D8 VENTURE diffractometer with Mo  $K\alpha$  (0.71073 Å) and Cu  $K\alpha$  (1.54178 Å) radiation. The structures were solved by the intrinsic phasing method, and the non-hydrogen atoms were anisotropically refined with full matrix least-squares using SHELXL-2019/1<sup>S1</sup> in the Bruker APEX4 v2021.10-0 program package.<sup>S2</sup> Hydrogen atoms were placed in calculated positions and refined using a riding model. Mass spectrometry was performed using a Bruker tims-TOF Pro 2 (high-resolution, ESI) instrument. IR spectra were recorded using a Bruker ALPHA system. All IR measurements were performed by the attenuated total reflectance (ATR) method. Strong, medium and weak signals are represented by (s), (m) and (w) in experimental details section, respectively. The magnetic susceptibility measurements were carried out using Quantum Design MPMS-XL7 EC and MPMS-5 EC SQUID magnetometers. The diamagnetic contribution from the sample holder and samples were estimated and corrected using the Pacault method.<sup>S3</sup> The X-band EPR spectra were recorded using a Bruker E500 spectrometer. The signal centers were calibrated by a Bruker ER035M Tesla meter. The samples were degassed by the freeze–pump–thaw method. UV-vis absorption spectra of solutions were measured using a JASCO V-650 instrument. All the theoretical calculations were conducted using a suite of Gaussian 16, Revision C.01 program.<sup>S4</sup>

## Experimental details

### 5-Aminoquinoline<sup>S5</sup>

5-Nitroquinoline (6.10 g, 34.7 mmol, 1 eq.) and  $\text{SnCl}_2 \cdot 2\text{H}_2\text{O}$  (39.1 g, 173.5 mmol, 5 eq.) were dissolved in EtOH (150 mL), and the mixture was stirred for 30 min at reflux temperature. After cooling to room temperature, the reaction mixture was neutralized with saturated aqueous  $\text{NaHCO}_3$  and extracted with EtOAc. The combined organic layers were dried over  $\text{Na}_2\text{SO}_4$  and concentrated under reduced pressure. The residue was purified by column chromatography (EtOAc) to afford the title compound as a pale yellow solid (4.983 g, quant.). Mp 108-111 °C ;  $^1\text{H-NMR}(\text{CDCl}_3, 400 \text{ MHz})$  :  $\delta$  = 8.90(dd, 1H,  $J$  = 4.0, 2.4 Hz), 8.19(dd, 1H,  $J$  = 8.0, 0.8 Hz), 7.59-7.50(m, 2H), 7.36(dd, 1H,  $J$  = 8.0, 4.0 Hz), 6.83(dd, 1H,  $J$  = 7.2, 0.8 Hz), 4.20(s, 2H) ppm ;  $^{13}\text{C-NMR}(\text{CDCl}_3, 100 \text{ MHz})$  :  $\delta$  = 150.4, 149.3, 142.4, 130.1, 129.6, 120.3, 119.7, 118.8, 110.1, ppm ; FT-IR : 3324(m), 3183(m), 1655(m), 1612(m), 1584(m), 1566(m), 1506(m), 1461(m), 1409(m), 1364(m), 1324(m), 1278(m), 1204(m), 788(s)  $\text{cm}^{-1}$  ; HRMS( $\text{ESI}^+$ -TOF) :  $m/z$   $[\text{M}+\text{H}]^+$  calcd. for  $\text{C}_9\text{H}_8\text{N}_2$ : 145.0760, found : 145.0768; elemental analysis calcd. (%) for  $\text{C}_9\text{H}_8\text{N}_2$  : C 74.98, H 5.59, N 19.43 ; found C 74.78, H 5.60, N 19.31.

### 5-Iodoquinoline<sup>S6</sup>

5-Aminoquinoline (2.52 g, 17.5 mmol, 1 eq.) was dissolved in 37 % HCl (35 mL), and  $\text{NaNO}_2$  (1.38 g, 19.3 mmol, 1.1 eq) was then added dropwise to the solution at 0 °C. The mixture was stirred for 30 min at 0 °C. The reaction mixture was added into KI (9.44 g, 63 mmol, 3.6 eq.) aqueous solution and allowed to stand overnight. After the reaction, the product was neutralized with saturated aqueous  $\text{NaHCO}_3$  and  $\text{Na}_2\text{SO}_3$ . The solid was filtered, then dissolved in 2-butanol. The combined organic layers were washed with brine, dried over  $\text{Na}_2\text{SO}_4$  and concentrated under reduced pressure. The residue was purified by column chromatography (chloroform) to afford the title compound as a pale yellow solid (2.28 g, 51 %). Mp 105-107 °C :  $^1\text{H-NMR}(\text{CDCl}_3, 400 \text{ MHz})$  :  $\delta$  = 8.89(dd, 1H,  $J$  = 8.4, 2.0 Hz), 8.38(d, 1H,  $J$  = 9.2 Hz), 8.11(m, 2H), 7.54(t, 1H,  $J$  = 8.0 Hz), 7.49-7.41(m, 1H) ppm ;  $^{13}\text{C-NMR}(\text{CDCl}_3, 100 \text{ MHz})$  :  $\delta$  = 151.2, 148.7, 140.3, 137.7, 130.5, 130.4, 130.2, 122.8, 98.5 ppm ; FT-IR : 788(s)  $\text{cm}^{-1}$  ; elemental analysis calcd. (%) for  $\text{C}_9\text{H}_6\text{IN}$  : C 42.38, H 2.37, N 5.49 ; found C 42.28, H 2.36, N 5.46.

### 5-[2-(Trimethylsilyl)ethynyl]quinoline<sup>S7</sup>

5-Iodoquinoline (2.33 g, 9.13 mmol, 1 eq.) was dissolved in TEA (20 mL). TMSA (1.92 mL, 13.7 mmol, 1.5 eq.),  $\text{Pd}(\text{PPh}_3)_2\text{Cl}_2$  (313 mg, 0.46 mmol, 0.05 eq.), and CuI (210 mg, 1.10 mmol, 0.12 eq.) were then added, and the mixture was stirred for 16 h at 50 °C under nitrogen atmosphere. After the reaction, saturated aqueous  $\text{NH}_4\text{Cl}$  was added, and the mixture was extracted with  $\text{CHCl}_3$ . The combined organic layers were washed with brine, dried over  $\text{Na}_2\text{SO}_4$  and concentrated under reduced pressure. The product was purified by silica gel chromatography (EtOAc: Hexane = 1: 3) to afford the

title compound as a brown oil (1.93 g, 93 %).  $^1\text{H-NMR}(\text{CDCl}_3, 400 \text{ MHz})$  :  $\delta$  = 8.94(dd, 1H,  $J$  = 4.4, 1.6 Hz), 8.62(d, 1H,  $J$  = 8.4 Hz), 8.09(d, 1H,  $J$  = 8.4 Hz), 7.75(dd, 1H,  $J$  = 7.2, 0.8 Hz), 7.64(m, 1H), 7.49(dd, 1H,  $J$  = 8.0, 4.0 Hz), 0.30(s, 9H) ppm ;  $^{13}\text{C-NMR}(\text{CDCl}_3, 100 \text{ MHz})$  :  $\delta$  = 150.8, 147.8, 134.5, 131.0, 130.5, 128.7, 128.7, 121.7, 121.1, 101.6, 100.3, -0.5 ppm ; HRMS(ESI<sup>+</sup>-TOF) :  $m/z$  [M+H]<sup>+</sup> calcd. for  $\text{C}_{14}\text{H}_{15}\text{NSi}$  : 226.1047, found : 226.1049; FT-IR : 2958(w), 2154(w), 1250(m), 843(s)  $\text{cm}^{-1}$ .

#### 5-[2-(Trimethylsilyl)ethynyl]quinoline *N*-oxide<sup>S8</sup>

5-[2-(Trimethylsilyl)ethynyl]quinoline (1.93 g, 8.58 mmol, 1 eq.) was dissolved in  $\text{CHCl}_3$  (30 mL). 69 % *m*-CPBA (3.22 g, 12.87 mmol, 1.5 eq.) dissolved in  $\text{CHCl}_3$  was added to the solution at 0 °C, and the mixture was stirred for 16 h at room temperature. The mixture was neutralized with ammonia water and extracted with  $\text{CHCl}_3$ . The combined organic layers were washed with brine, dried over  $\text{Na}_2\text{SO}_4$  and concentrated under reduced pressure. The product was purified by column chromatography ( $\text{CHCl}_3$ ) to afford the title compound as a white solid (1.42 g, 68 %). Mp 148-150 °C ;  $^1\text{H-NMR}(\text{CDCl}_3, 500 \text{ MHz})$  :  $\delta$  = 8.73(d, 1H,  $J$  = 8.5 Hz), 8.55(d, 1H,  $J$  = 6.5 Hz), 8.18(d, 1H,  $J$  = 8.5 Hz), 7.82(dd, 1H,  $J$  = 7.5, 1.0 Hz), 7.69(m, 1H), 7.37(m, 1H), 0.34(s, 9H) ppm ;  $^{13}\text{C-NMR}(\text{CDCl}_3, 125 \text{ MHz})$  :  $\delta$  = 141.7, 135.9, 133.1, 131.1, 130.4, 129.6, 124.4, 122.0, 121.5, 120.4, 102.1, 100.7, -0.1 ppm ; HRMS(ESI<sup>+</sup>-TOF) :  $m/z$  [M+H]<sup>+</sup> calcd. for  $\text{C}_{14}\text{H}_{15}\text{NOSi}$  : 242.0996, found : 242.0996; FT-IR : 2954(w), 2146(w), 1560(w), 1512(w), 1406(m), 1247(m)  $\text{cm}^{-1}$ ; elemental analysis calcd. (%) for  $\text{C}_{14}\text{H}_{15}\text{NOSi}$  : C 69.67, H 6.26, N 5.80 ; found C 69.18, H 6.26, N 5.77.

#### 5-[2-(Trimethylsilyl)ethynyl]-2-phenylquinoline *N*-oxide<sup>S9</sup>

5-[2-(Trimethylsilyl)ethynyl]quinoline *N*-oxide (1.37 g, 5.68 mmol, 1 eq.) was dissolved in dry THF (30 mL). Phenyl magnesium bromide THF solution (5.68 mL, 5.68 mmol, 1 eq.) was added, and the mixture was stirred for 1 h at room temperature under nitrogen atmosphere. An additional portion of phenyl magnesium bromide THF solution (5.68 mL, 5.68 mmol, 1 eq.) was added, and the mixture was stirred for 16 h at the reflux temperature. After cooling to the room temperature, the reaction mixture was quenched with saturated aqueous  $\text{NH}_4\text{Cl}$  and extracted with  $\text{CHCl}_3$ . The combined organic layers were washed with brine, dried over  $\text{Na}_2\text{SO}_4$  and concentrated under reduced pressure. The product was purified by silica gel chromatography ( $\text{CHCl}_3$ : hexane = 1: 1) to afford the title compound as a white solid (334 mg, 19 %). Mp 148-149 °C ;  $^1\text{H-NMR}(\text{CDCl}_3, 400 \text{ MHz})$  :  $\delta$  = 8.83(d, 1H,  $J$  = 9.2 Hz), 8.19(d, 1H,  $J$  = 9.2 Hz), 7.98(d, 2H,  $J$  = 7.2 Hz), 7.81(dd, 1H,  $J$  = 7.2, 0.8 Hz), 7.70(m, 1H), 7.60-7.49(m, 4H), 0.35(s, 9H) ppm ;  $^{13}\text{C-NMR}(\text{CDCl}_3, 100 \text{ MHz})$  :  $\delta$  = 145.3, 142.3, 133.3, 132.7, 130.1, 129.7, 129.7, 129.6, 128.3, 123.8, 123.6, 121.7, 120.9, 101.8, 100.9, -0.1 ppm ; HRMS(ESI<sup>+</sup>-TOF) :  $m/z$  [M+H]<sup>+</sup> calcd. for  $\text{C}_{20}\text{H}_{19}\text{NOSi}$  : 318.1309, found : 318.1311; FT-IR : 2955(w), 2148(w), 1248(m)  $\text{cm}^{-1}$ ; elemental analysis calcd. (%) for  $\text{C}_{20}\text{H}_{19}\text{NOSi}$  : C 75.67, H 6.03, N 4.41 ; found C 75.07, H 6.06, N 4.43.

5-[2-(Trimethylsilyl)ethynyl]-2,2-diphenyl-1,2-dihydroquinoline *N*-oxyl (**2**)<sup>S9</sup>

5-[2-(Trimethylsilyl)ethynyl]-2-phenylquinoline *N*-oxide (230 mg, 0.724 mmol, 1 eq.) was dissolved in dry THF (3 mL). Phenyl magnesium bromide THF solution (724  $\mu$ L, 0.724 mmol, 1 eq.) was added, and the mixture was stirred for 1 h at room temperature under nitrogen atmosphere. An additional portion of phenyl magnesium bromide THF solution (724  $\mu$ L, 0.724 mmol, 1 eq.) was added, and stirring was continued for 16 h at the same condition. After the reaction, the reaction mixture was quenched with saturated aqueous  $\text{NH}_4\text{Cl}$  and extracted with  $\text{CHCl}_3$ . The combined organic layers were washed with brine, dried over  $\text{Na}_2\text{SO}_4$  and concentrated under reduced pressure. The product was purified by silica gel chromatography ( $\text{CHCl}_3$ : Hexane = 1: 3) to afford dark red solid and then recrystallized from EtOH/dichloromethane to afford the title compound as a dark red crystal (84 mg, 34 %). Mp 140-141  $^\circ\text{C}$  ; HRMS( $\text{ESI}^+$ -TOF) :  $m/z$   $[\text{M}+\text{H}]^+$  calcd. for  $\text{C}_{26}\text{H}_{24}\text{NOSi}$ : 395.1700, found : 395.1715; FT-IR : 2961(w), 2145(w), 1246(m)  $\text{cm}^{-1}$  ; elemental analysis calcd. (%) for  $\text{C}_{26}\text{H}_{24}\text{NOSi}$  : C 79.15, H 6.13, N 3.55 ; found C 78.49, H 6.13, N 3.63.

5-Ethynyl-2,2-diphenyl-1,2-dihydroquinoline *N*-oxyl (**3**)<sup>S10</sup>

5-[2-(Trimethylsilyl)ethynyl]-2,2-diphenyl-1,2-dihydroquinoline *N*-oxyl (540 mg, 1.37 mmol, 1 eq.) was dissolved in MeOH (50 mL). KOH aq. was added and stirred for 1 h at room temperature. The reaction mixture was quenched with saturated aqueous  $\text{NH}_4\text{Cl}$  and extracted with  $\text{CHCl}_3$ . The combined organic layers were dried over  $\text{Na}_2\text{SO}_4$  and concentrated under reduced pressure. The residue was purified by silica gel chromatography ( $\text{CHCl}_3$ ) to afford dark red liquid. The purified liquid was recrystallized from EtOH to afford the title compound as a dark red crystal (130 mg, 30 %). Mp 131-132  $^\circ\text{C}$  ; HRMS( $\text{ESI}^+$ -TOF) :  $m/z$   $[\text{M}+\text{H}]^+$  calcd. for  $\text{C}_{23}\text{H}_{16}\text{NO}$ : 323.1305, found : 323.1300; FT-IR : 3225(m), 3021(w), 2102(w)  $\text{cm}^{-1}$  ; elemental analysis calcd. (%) for  $\text{C}_{22}\text{H}_{18}\text{NO}_2$  : C 85.69, H 5.00, N 4.34 ; found C 85.38, H 5.17, N 4.26.

## EPR simulation parameters

Simulation of EPR spectra for **2** and **3** were carried out by Winsim program<sup>S11</sup>.

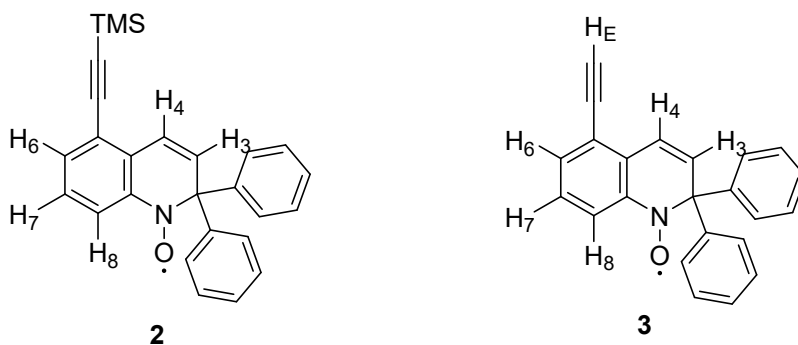

**Table S1** The hfcc for nitrogen and hydrogen atoms of compound **1–3**.

|                   | <b>2</b> [G] | <b>3</b> [G] | <b>1</b> <sup>S12</sup> [G] |
|-------------------|--------------|--------------|-----------------------------|
| N                 | 9.61         | 9.62         | 10.17                       |
| H <sub>3</sub>    | 1.43         | 1.43         | 1.42                        |
| H <sub>4</sub>    | 0.60         | 0.61         | 0.55                        |
| H <sub>6(8)</sub> | 3.23         | 3.18         | 3.20                        |
| H <sub>7</sub>    | 1.07         | 1.12         | 1.07                        |
| H <sub>8(6)</sub> | 3.06         | 3.07         | 3.20                        |
| H <sub>E</sub>    | —            | 0.42         | —                           |

## UV-vis measurement

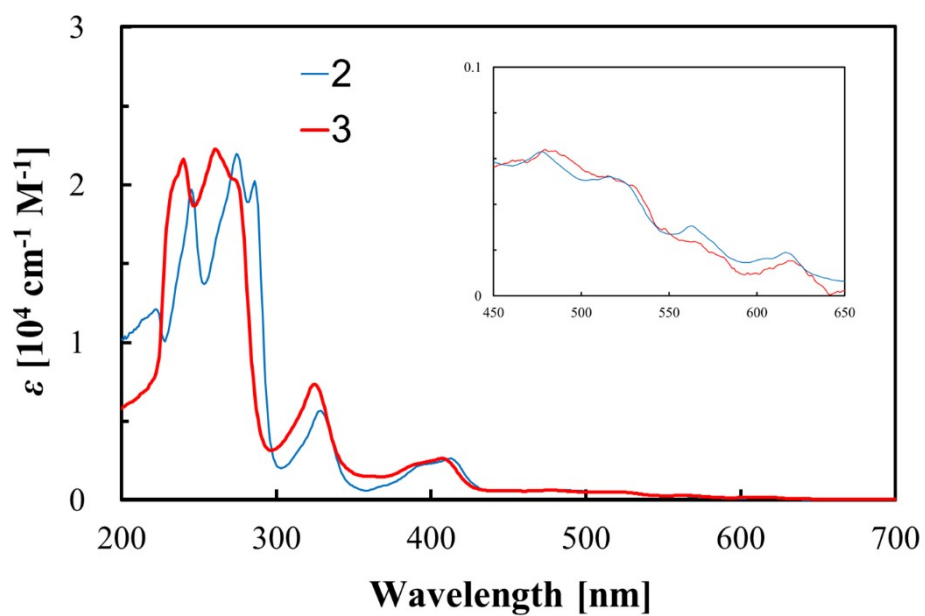

**Fig. S1** UV-vis absorption spectra at room temperature of **2**(blue) and **3**(red) in 1 × 10<sup>-5</sup> M solutions in DCM.

### Cyclic voltammetry

Cyclic voltammetry measurements were carried out. The plots and redox potential were calibrated by ferrocene as internal reference. The background from the blank (only electrolyte) was subtracted to correct the data. The samples were degassed by passing nitrogen gas through the solvent. Compound **1**, **2**, and **3** showed reversible oxidation peaks at  $E_{1/2} = 0.462$  V,  $E_{1/2} = 0.558$  V, and  $E_{1/2} = 0.569$  V, respectively.

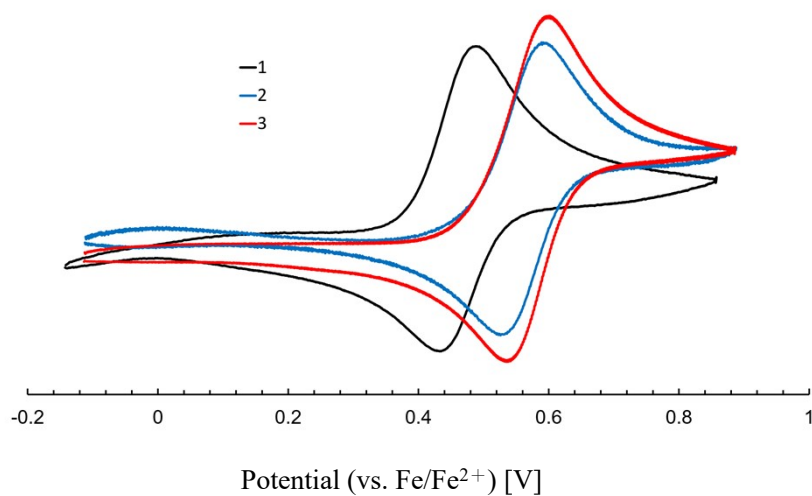

**Fig. S2** Cyclic Voltammogram of **2**(blue) and **3**(red). ( $5.0 \times 10^{-4}$  M solutions in MeCN, a GC disk electrode  $d = 1.0$  mm, supporting electrolyte 0.1 M Bu<sub>4</sub>NBF<sub>4</sub>/MeCN,  $T = 298$  K, 100 mV·s<sup>-1</sup> scan rate.)



## Crystallographic parameter

|                                                                        | <b>2</b>                                                          | <b>3</b>                                                          | <b>3</b>                                                         |
|------------------------------------------------------------------------|-------------------------------------------------------------------|-------------------------------------------------------------------|------------------------------------------------------------------|
| Formula                                                                | C <sub>26</sub> H <sub>24</sub> NOSi                              | C <sub>23</sub> H <sub>16</sub> NO                                | C <sub>23</sub> H <sub>16</sub> NO                               |
| <i>M</i>                                                               | 394.55                                                            | 322.37                                                            | 322.37                                                           |
| Radiation type                                                         | Mo K $\alpha$                                                     | Mo K $\alpha$                                                     | Cu K $\alpha$                                                    |
| Temperature [K]                                                        | 90.(2)                                                            | 90.(2)                                                            | 90.(2)                                                           |
| Crystal size [mm]                                                      | 0.500× 0.118× 0.072                                               | 0.720× 0.200× 0.160                                               | 0.400× 0.400× 0.200                                              |
| Crystal system                                                         | monoclinic                                                        | orthorhombic                                                      | orthorhombic                                                     |
| Space group                                                            | <i>P</i> 2 <sub>1</sub> / <i>n</i>                                | <i>P</i> 2 <sub>1</sub> 2 <sub>1</sub> 2 <sub>1</sub>             | <i>P</i> 2 <sub>1</sub> 2 <sub>1</sub> 2 <sub>1</sub>            |
| <i>a</i> [Å]                                                           | 10.8542(3)                                                        | 9.7866(5)                                                         | 12.24980(10)                                                     |
| <i>b</i> [Å]                                                           | 9.0975(2)                                                         | 12.2573(7)                                                        | 13.7016(2)                                                       |
| <i>c</i> [Å]                                                           | 22.1134(6)                                                        | 13.7175(7)                                                        | 9.78620(10)                                                      |
| $\beta$ [°]                                                            | 93.2990(10)                                                       | 90                                                                | 90                                                               |
| <i>V</i> [Å <sup>3</sup> ]                                             | 2179.99(10)                                                       | 1645.51(15)                                                       | 1642.53(3)                                                       |
| <i>Z</i>                                                               | 4                                                                 | 4                                                                 | 4                                                                |
| <i>D</i> [g cm <sup>-3</sup> ]                                         | 1.202                                                             | 1.301                                                             | 1.304                                                            |
| $\mu$ [mm <sup>-1</sup> ]                                              | 0.124                                                             | 0.079                                                             | 0.622                                                            |
| <i>F</i> (000)                                                         | 836                                                               | 676                                                               | 676                                                              |
| $\theta$ (min, max) [°]                                                | 2.42, 25.02                                                       | 2.23, 25.03                                                       | 5.56, 66.38                                                      |
| Index ranges                                                           | -12 ≤ <i>h</i> ≤ 12<br>-10 ≤ <i>k</i> ≤ 10<br>-26 ≤ <i>l</i> ≤ 26 | -11 ≤ <i>h</i> ≤ 11<br>-14 ≤ <i>k</i> ≤ 14<br>-16 ≤ <i>l</i> ≤ 15 | -14 ≤ <i>h</i> ≤ 14<br>-15 ≤ <i>k</i> ≤ 16<br>-11 ≤ <i>l</i> ≤ 8 |
| Measured reflection                                                    | 22134                                                             | 17814                                                             | 12516                                                            |
| Independent reflection ( <i>R</i> <sub>int</sub> )                     | 3841(0.0502)                                                      | 2921(0.0491)                                                      | 2873(0.0673)                                                     |
| Observed reflection ( <i>I</i> > 2 $\sigma$ ( <i>I</i> ))              | 2779                                                              | 2614                                                              | 2734                                                             |
| <i>GoF</i>                                                             | 1.153                                                             | 1.117                                                             | 1.046                                                            |
| <i>R</i> , <i>R</i> <sub>w</sub> ( <i>I</i> > 2 $\sigma$ ( <i>I</i> )) | 0.0649, 0.1601                                                    | 0.0433, 0.1114                                                    | 0.0318, 0.0791                                                   |
| <i>R</i> , <i>R</i> <sub>w</sub> (all data)                            | 0.1025, 0.2123                                                    | 0.0559, 0.1317                                                    | 0.406, 0.0807                                                    |
| Resd density (min, max)                                                | 0.340, -0.503                                                     | 0.204, -0.262                                                     | 0.202, -0.181                                                    |
| <i>CCDC</i>                                                            | 2483838                                                           | 2483839                                                           | 2484892                                                          |

**Table S2** Crystallographic parameters of **2** and **3**.

## IR spectra

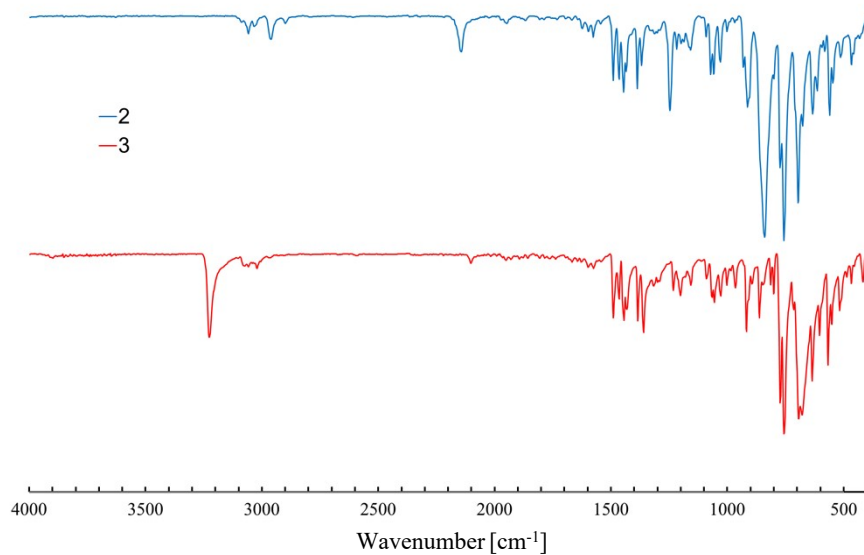

**Fig. S3** IR spectra of compound **2** (blue) and **3** (red) in solid state.

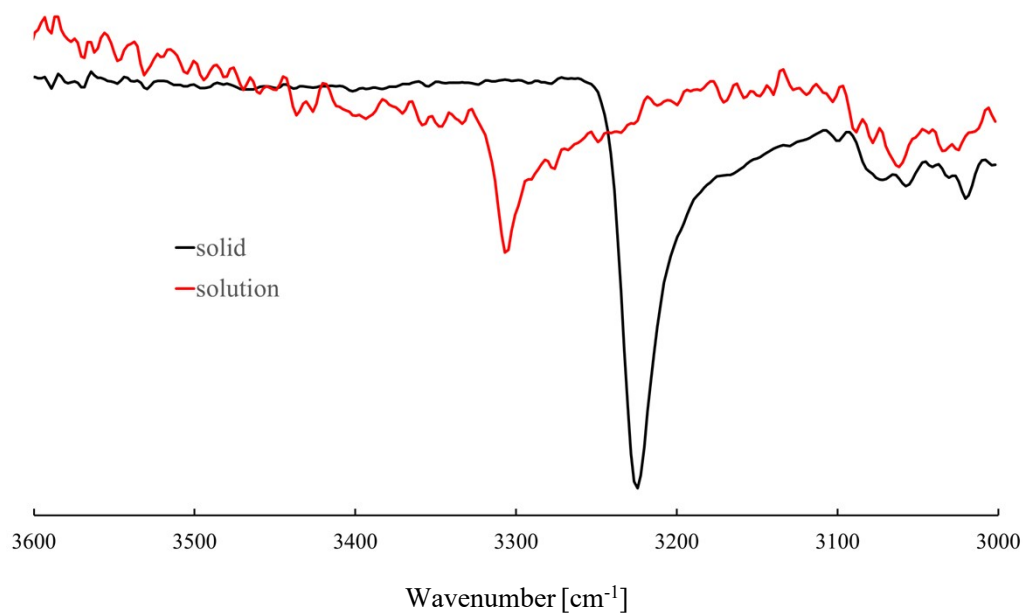

**Fig. S4** IR spectra of compound **3**: solid state (black) and  $5.0 \times 10^{-4}$  M solution in carbon tetrachloride (red).

### Orbital energy level

The calculation was performed at the UB3LYP/6-31G(d) level of theory. The coordination was obtained from crystallographic geometry.

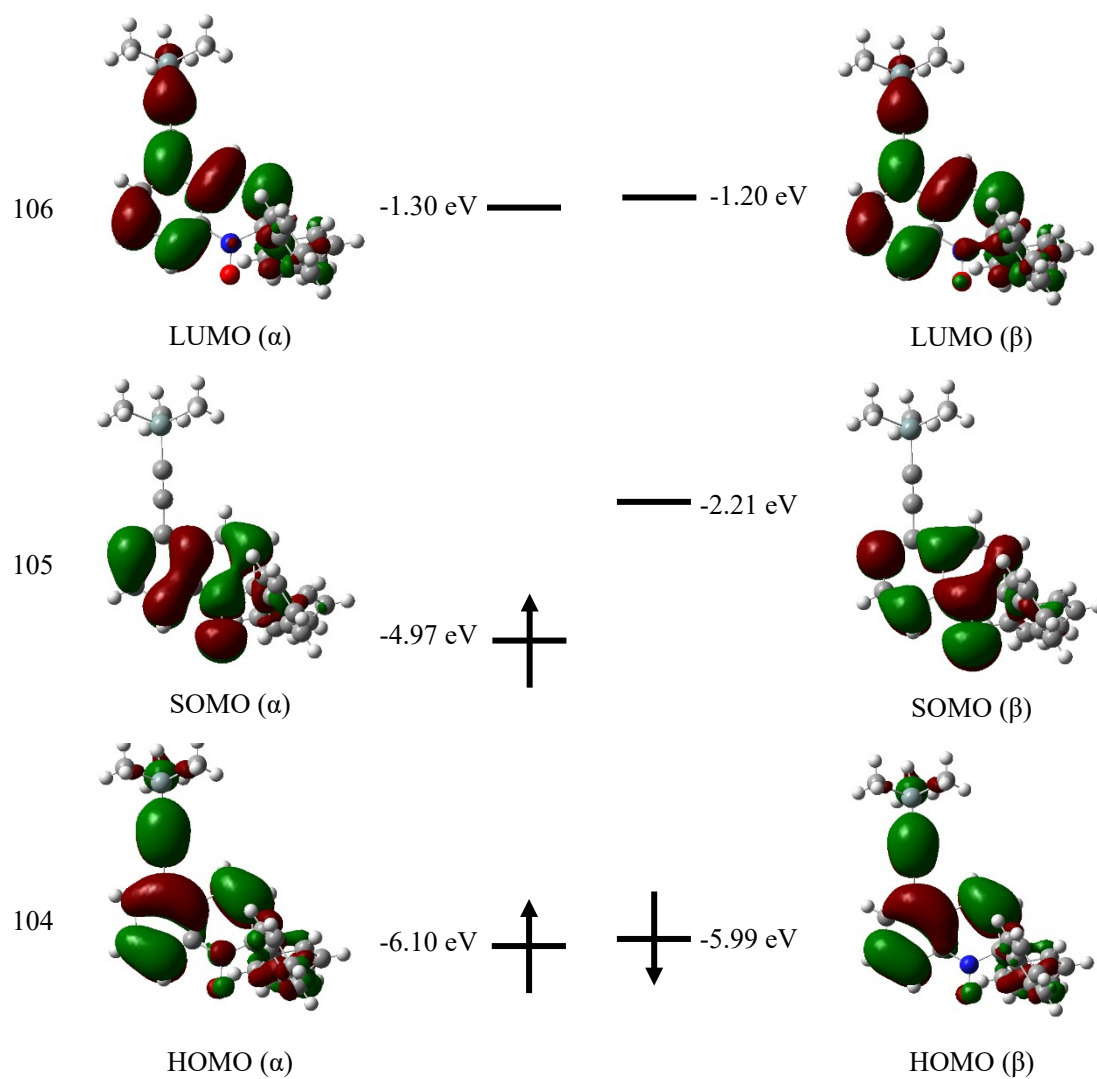

**Fig. S5** Orbital energy level of **2** (UB3LYP/6-31G(d)).

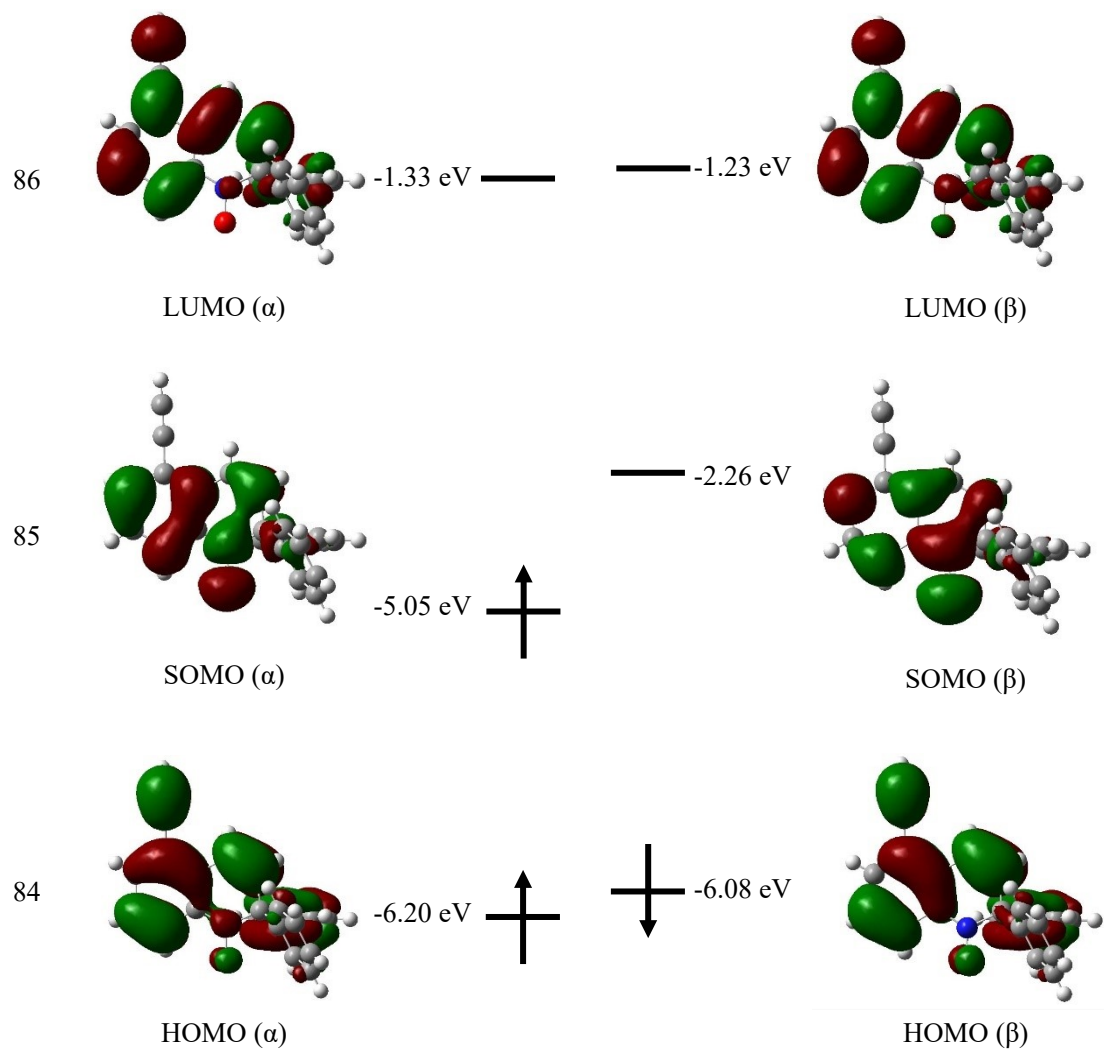

**Fig. S6** Orbital energy level of **3** (UB3LYP/6-31G(d)).

## Distribution of spin density

Calculated at UB3LYP/6-31G(d) level of theory.

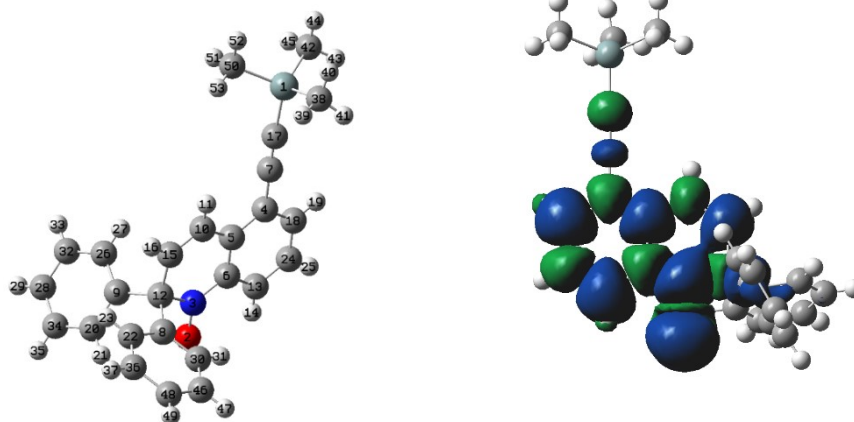

**Fig. S7** Atom number (left) and spin density (right) of **2**.

**Table S3** The spin density distribution on the atom of **2**.

| Atom | Spin density | Atom | Spin density | Atom | Spin density |
|------|--------------|------|--------------|------|--------------|
| 1 Si | 0.000246     | 19 C | -0.001550    | 37 H | 0.000140     |
| 2 O  | 0.482126     | 20 C | 0.000161     | 38 C | -0.000778    |
| 3 N  | 0.338504     | 21 H | -0.000853    | 39 H | 0.000036     |
| 4 C  | -0.072920    | 22 C | 0.000036     | 40 H | -0.000107    |
| 5 C  | 0.130850     | 23 H | -0.079715    | 41 H | 0.000033     |
| 6 C  | -0.119178    | 24 C | 0.002753     | 42 C | -0.000197    |
| 7 C  | 0.017709     | 25 H | -0.001720    | 43 H | 0.000013     |
| 8 C  | 0.024552     | 26 C | 0.000324     | 44 C | -0.000027    |
| 9 C  | 0.021524     | 27 H | -0.001160    | 45 H | 0.000007     |
| 10 H | -0.041447    | 28 C | 0.000036     | 46 H | 0.001546     |
| 11 C | 0.001532     | 29 H | -0.002130    | 47 H | 0.000022     |
| 12 C | -0.021910    | 30 C | -0.001851    | 48 C | -0.000009    |
| 13 C | 0.153122     | 31 H | 0.001601     | 49 H | -0.000028    |
| 14 H | -0.007203    | 32 C | 0.000008     | 50 C | -0.000223    |
| 15 C | 0.058683     | 33 H | 0.002536     | 51 H | 0.000008     |
| 16 H | -0.003058    | 34 C | 0.000117     | 52 H | -0.000028    |
| 17 C | -0.024925    | 35 H | 0.002156     | 53 H | 0.000013     |
| 18 H | 0.146854     | 36 C | -0.001550    |      |              |

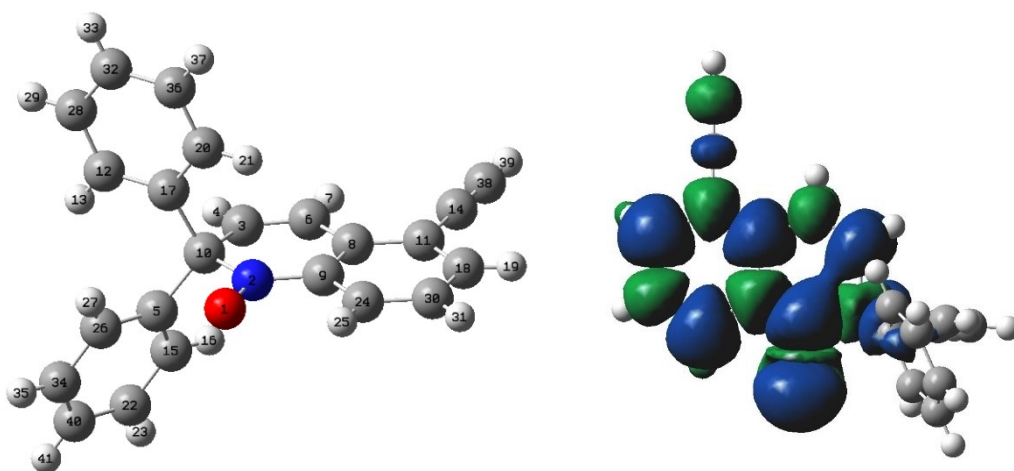

**Fig. S8** Atom number (left) and spin density (right) of **3**.

**Table S4** The spin density distribution on the atom of **3**.

| Atom | Spin density | Atom | Spin density | Atom | Spin density |
|------|--------------|------|--------------|------|--------------|
| 1 O  | 0.489493     | 15 C | -0.002090    | 29H  | 0.000266     |
| 2 N  | 0.334150     | 16 H | 0.000705     | 30 C | -0.077870    |
| 3 C  | 0.059871     | 17 C | 0.027537     | 31 H | 0.002695     |
| 4 H  | -0.003080    | 18 C | 0.143528     | 32 C | 0.000253     |
| 5 C  | 0.017841     | 19 H | -0.006080    | 33 H | -0.000030    |
| 6 C  | -0.042570    | 20 C | 0.000427     | 34 C | 0.002422     |
| 7 H  | 0.001548     | 21 H | -0.001010    | 35 H | 0.000053     |
| 8 C  | 0.130355     | 22 C | 0.001894     | 36 C | -0.000300    |
| 9 C  | -0.118310    | 23 H | -0.000019    | 37 H | 0.000115     |
| 10 C | -0.021110    | 24 C | 0.149739     | 38 C | -0.026410    |
| 11 C | -0.072740    | 25 H | -0.007060    | 39 H | 0.000985     |
| 12 C | -0.000030    | 26 C | -0.002280    | 40 C | -0.001750    |
| 13 H | 0.000060     | 27 H | 0.000172     | 41 H | 0.000065     |
| 14 C | 0.017748     | 28 C | 0.000791     |      |              |

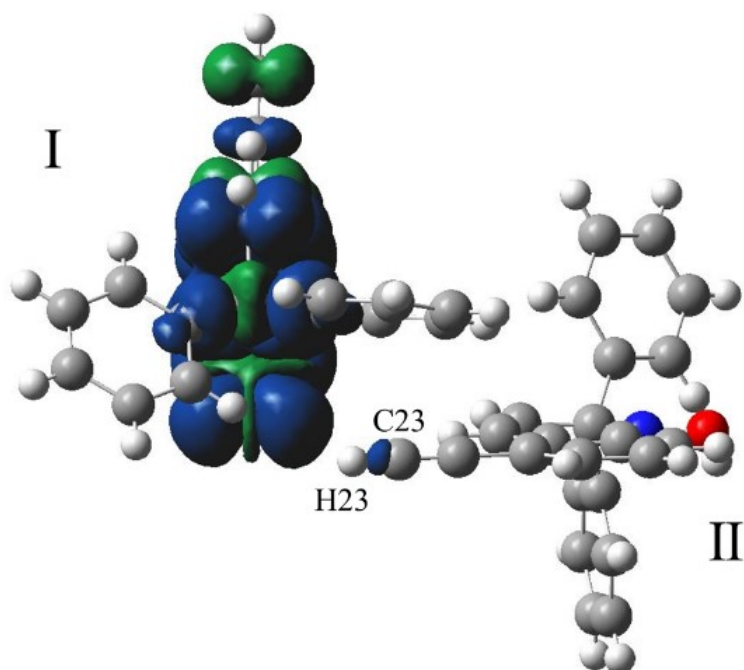

**Fig. S9** Spin density distribution of ferromagnetic interacted molecules in the crystal of **3** calculated at the UB3LYP/6-31G(d) level of theory. Isovalue = 0.0004. The radical in II was inactivated by the addition of a hydrogen atom at the oxygen atom.



## Magnetic interaction

The magnetic susceptibility data were fitted using Heisenberg model Hamiltonian <sup>S13,14</sup> :

$$H = -2J \sum_{\langle i, j \rangle} S_i \cdot S_j$$

Here,  $J$  represents the exchange interaction between the equally spaced neighbouring radicals  $i$  and  $j$ .

The experimental data were fitted using modified equation that takes into account the molecular field. To account for the interchain interactions, a Weiss temperature was introduced by replacing  $T$  with  $T - \theta_{1D}$ .

The Heisenberg 1D ferromagnetic chain model was used for fitting the data of compound **2** :

$$\chi_m = \frac{1}{T - \theta_{1D}} \frac{N_A \mu_B^2 g^2}{4k_B} \left( \frac{1 + 5.7979916 \left(\frac{x}{2}\right) + 16.902653 \left(\frac{x}{2}\right)^2 + 29.376885 \left(\frac{x}{2}\right)^3 + 29.832959 \left(\frac{x}{2}\right)^4 + 14.036918 \left(\frac{x}{2}\right)^5}{1 + 2.7979916 \left(\frac{x}{2}\right) + 7.008678 \left(\frac{x}{2}\right)^2 + 8.6538644 \left(\frac{x}{2}\right)^3 + 4.5743114 \left(\frac{x}{2}\right)^4} \right)^{\frac{2}{3}}$$

In contrast, the Heisenberg 1D antiferromagnetic chain model was used for compound **3** :

$$\chi_m = \frac{1}{T - \theta_{1D}} \frac{N_A \mu_B^2 g^2}{k_B} \frac{0.25 + 0.074975x + 0.075235x^2}{1 + 0.9931x + 0.172135x^2 + 0.757825x^3}$$

$x = |J| / k_B T$ .<sup>S15</sup>  $N_A$  is Avogadro's constant,  $\mu_B$  is the Bohr magneton,  $g$  is the  $g$ -factor, and  $k_B$  is the Boltzmann constant.

The calculated  $J$  value ( $J_{\text{calcd.}}$ ) was obtained from Yamaguchi's equation.<sup>S16</sup>

$$J_{\text{calcd.}} = - \frac{E_{\text{BS}} - E_{\text{T}}}{\langle S^2 \rangle_{\text{T}} - \langle S^2 \rangle_{\text{BS}}}$$

The terms  $E$  is the total energy.  $\langle S^2 \rangle_{\text{T}}$  and  $\langle S^2 \rangle_{\text{BS}}$  represent the expectation values of the squares of the total spin operators for the T and BS solutions, respectively.<sup>S16</sup>

Calculated at UB3LYP/6-31G(d) level of theory.

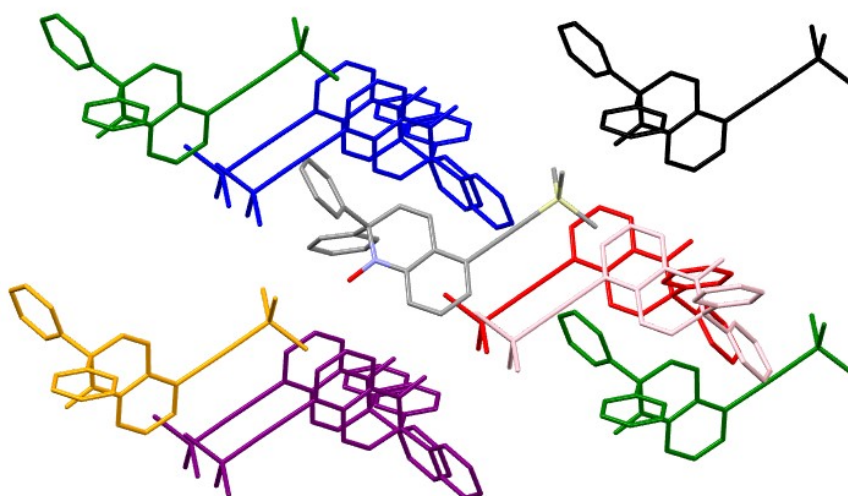

**Table S5** Correspondence of name, color, and symmetry for **2**.

| Contacts | Color  | Symmetry                  |
|----------|--------|---------------------------|
| $J_1$    | Red    | $(1-x, 1-y, 1-z)$         |
| $J_2$    | Blue   | $(1/2-x, 1/2+y, 1/2-z)$   |
| $J_3$    | Green  | $(-1/2+x, 1/2-y, -1/2+z)$ |
| $J_4$    | Orange | $(1/2+x, 3/2-y, -1/2+z)$  |
| $J_5$    | Pink   | $(1-x, 2-y, 1-z)$         |
| $J_6$    | Purple | $(3/2-x, -1/2+y, 1/2-z)$  |
| $J_7$    | Black  | $(1/2+x, 1/2-y, -1/2+z)$  |

**Table S6** Calculated  $J$  value and corresponding parameters for **2**.

| Compound                  | $E_{BS}/\text{Hartree}$ | $E_T/\text{Hartree}$ | $\langle S^2 \rangle_{BS}$ | $\langle S^2 \rangle_T$ | $2J_{\text{calcd.}}/\text{cm}^{-1}$ |
|---------------------------|-------------------------|----------------------|----------------------------|-------------------------|-------------------------------------|
| <b>2-<math>J_1</math></b> | -2848.5487789           | -2848.5487789        | 1.034400                   | 2.034399                | 0.0                                 |
| <b>2-<math>J_2</math></b> | -2848.5457576           | -2848.5457576        | 1.033895                   | 2.033894                | 0.0                                 |
| <b>2-<math>J_3</math></b> | -2848.5463811           | -2848.5463811        | 1.033824                   | 2.033826                | 0.0                                 |
| <b>2-<math>J_4</math></b> | -2848.5448069           | -2848.5448069        | 1.033846                   | 2.033846                | 0.0                                 |
| <b>2-<math>J_5</math></b> | -2848.5448575           | -2848.5448576        | 1.033552                   | 2.033553                | 0.0                                 |
| <b>2-<math>J_6</math></b> | -2848.5478575           | -2848.5478599        | 1.034187                   | 2.034238                | 1.1                                 |
| <b>2-<math>J_7</math></b> | -2848.5462659           | -2848.5462659        | 1.033621                   | 2.033622                | 0.0                                 |

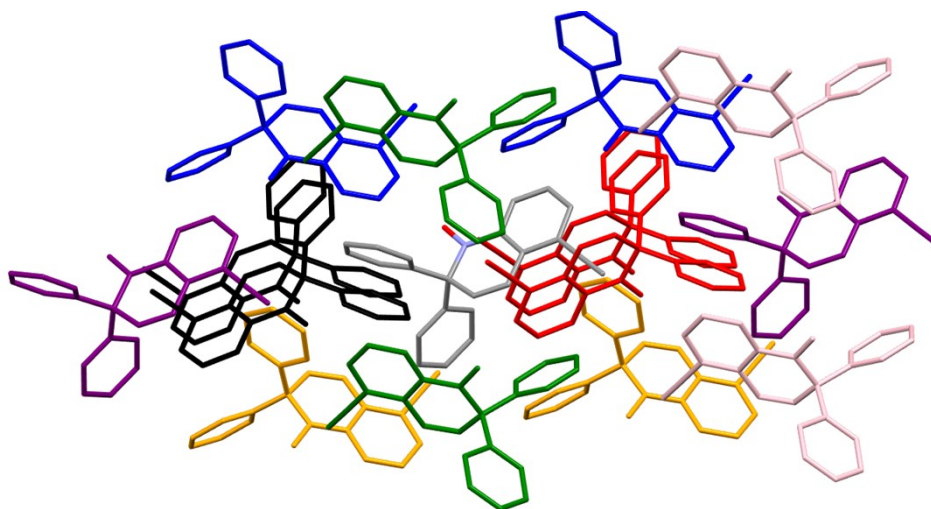

**Table S7** Correspondence of name, color, and symmetry for **3**.

| Contacts | Color  | Symmetry               |
|----------|--------|------------------------|
| $J_1$    | Red    | $(1/2-x, 1-y, 1/2+z)$  |
| $J_2$    | Blue   | $(-x, -1/2+y, 3/2-z)$  |
| $J_3$    | Green  | $(1/2+x, 3/2-y, 1-z)$  |
| $J_4$    | Orange | $(1-x, -1/2+y, 3/2-z)$ |
| $J_5$    | Pink   | $(1/2+x, 1/2-y, 1-z)$  |
| $J_6$    | Purple | $(x, -1+y, z)$         |
| $J_7$    | Black  | $(1/2-x, 2-y, 1/2+z)$  |

**Table S8** Calculated  $J$  value and corresponding parameters for **3**.

| Compound                  | $E_{BS}/\text{Hartree}$ | $E_T/\text{Hartree}$ | $\langle S^2 \rangle_{BS}$ | $\langle S^2 \rangle_T$ | $2J_{\text{calcd.}}/\text{cm}^{-1}$ |
|---------------------------|-------------------------|----------------------|----------------------------|-------------------------|-------------------------------------|
| <b>3-<math>J_1</math></b> | -2031.3139756           | -2031.3139783        | 1.034065                   | 2.034083                | 1.2                                 |
| <b>3-<math>J_2</math></b> | -2031.3127490           | -2031.3127493        | 1.033829                   | 2.033829                | 0.1                                 |
| <b>3-<math>J_3</math></b> | -2031.3109859           | -2031.3109789        | 1.033639                   | 2.033711                | -3.1                                |
| <b>3-<math>J_4</math></b> | -2031.3106214           | -2031.3106215        | 1.033132                   | 2.033134                | 0.0                                 |
| <b>3-<math>J_5</math></b> | -2031.3101704           | -2031.3101703        | 1.033297                   | 2.033293                | 0.0                                 |
| <b>3-<math>J_6</math></b> | -2031.3104721           | -2031.3104721        | 1.033251                   | 2.033251                | 0.0                                 |
| <b>3-<math>J_7</math></b> | -2031.3108973           | -2031.3108973        | 1.033280                   | 2.033282                | 0.0                                 |

## $^1\text{H}$ and $^{13}\text{C}$ NMR charts

### 1. 5-Aminoquinoline

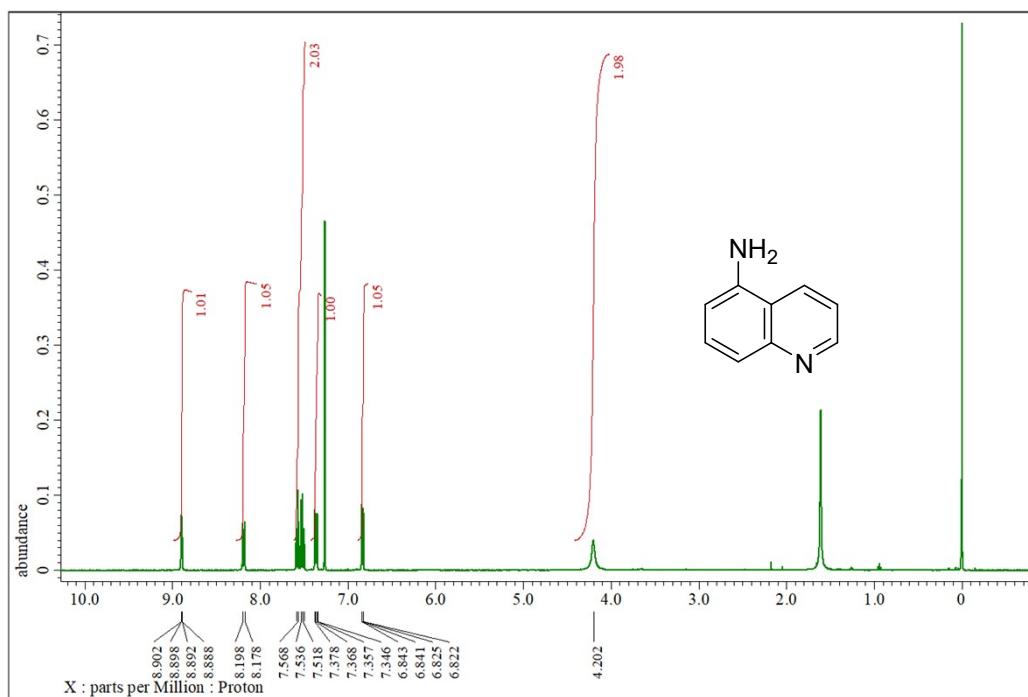

**Fig. S10**  $^1\text{H}$ -NMR spectrum for 5-aminoquinoline.

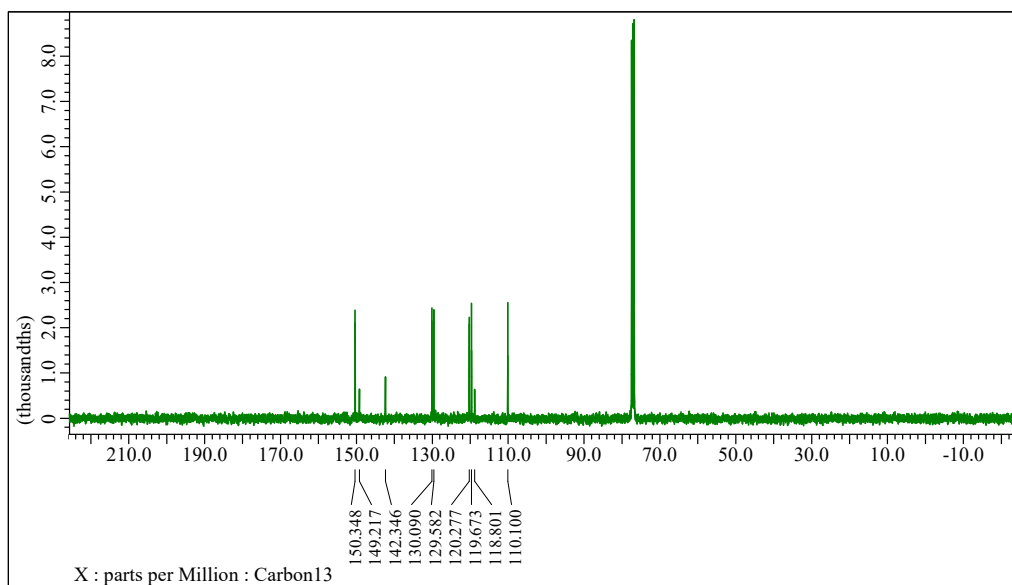

**Fig. S11**  $^{13}\text{C}$ -NMR spectrum for 5-aminoquinoline.

## 2. 5-Iodoquinoline

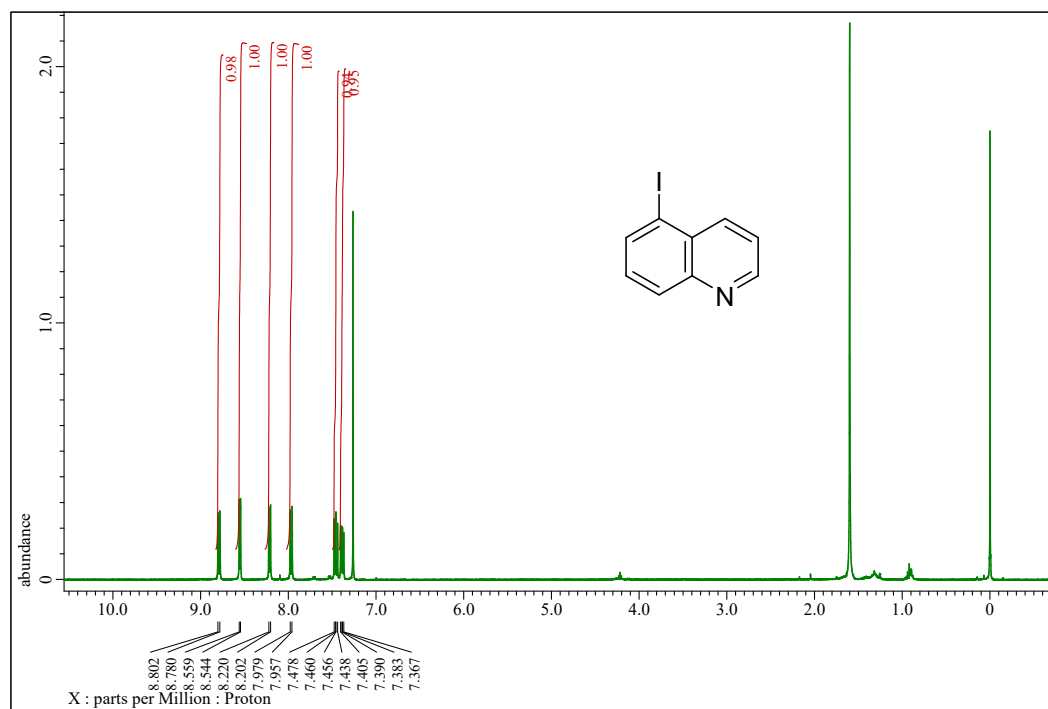

**Fig. S12** <sup>1</sup>H-NMR spectrum for 5-iodoquinoline.

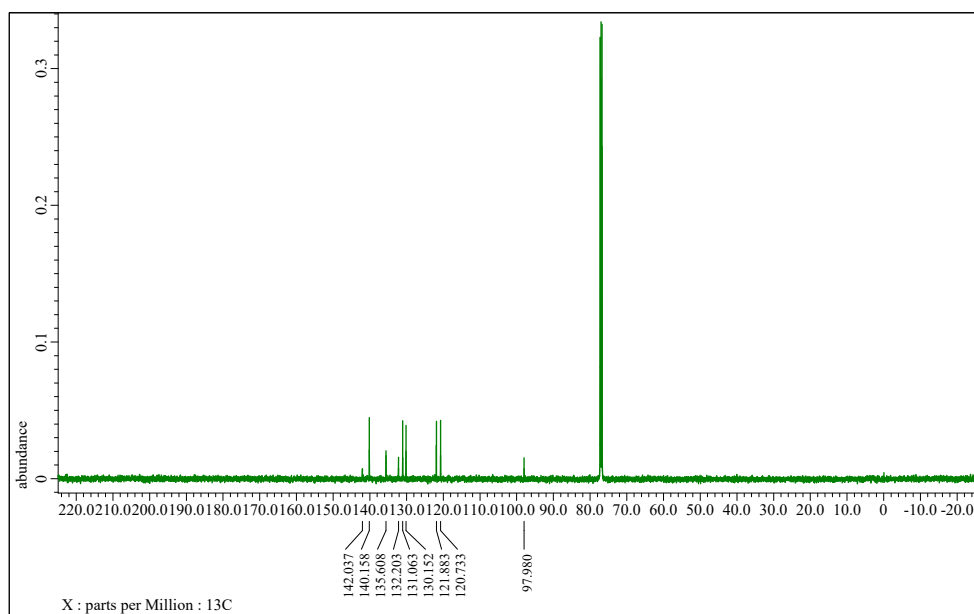

**Fig. S13** <sup>13</sup>C-NMR spectrum for 5-iodoquinoline.

3. 5-[2-(Trimethylsilyl)ethynyl]quinoline

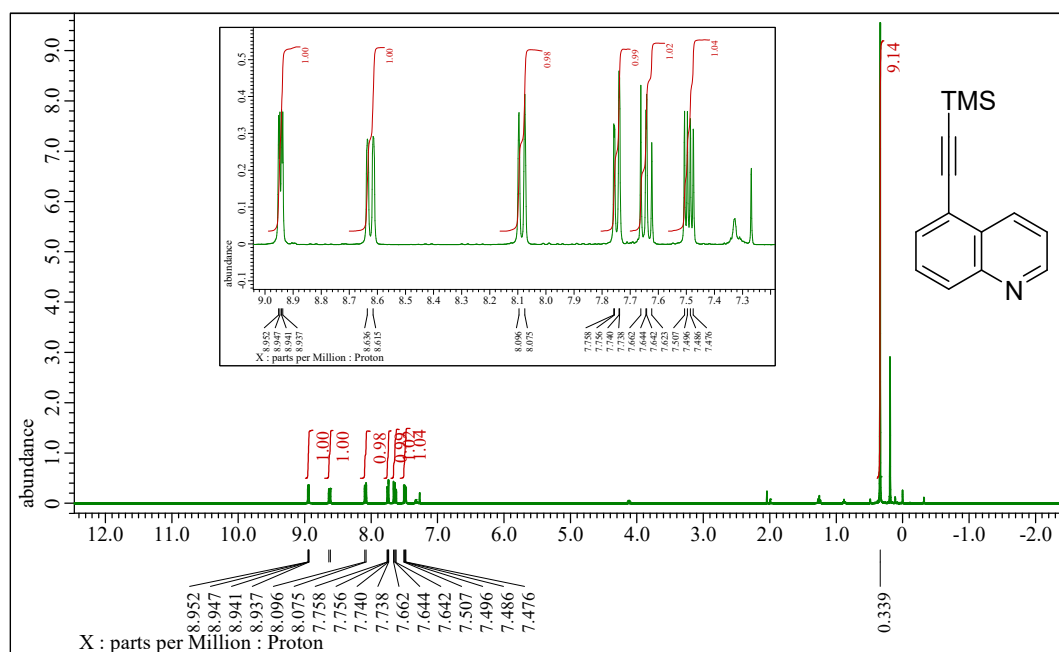

**Fig. S14** <sup>1</sup>H-NMR spectrum for 5-[2-(trimethylsilyl)ethynyl]quinoline.

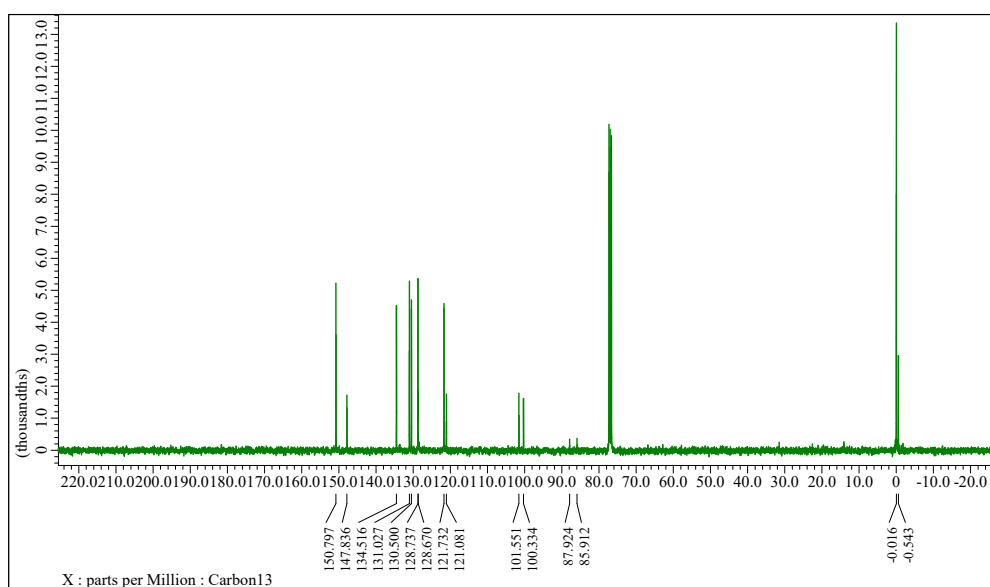

**Fig. S15** <sup>13</sup>C-NMR spectrum for 5-[2-(trimethylsilyl)ethynyl]quinoline.

4. 5-[2-(Trimethylsilyl)ethynyl]quinoline *N*-oxide

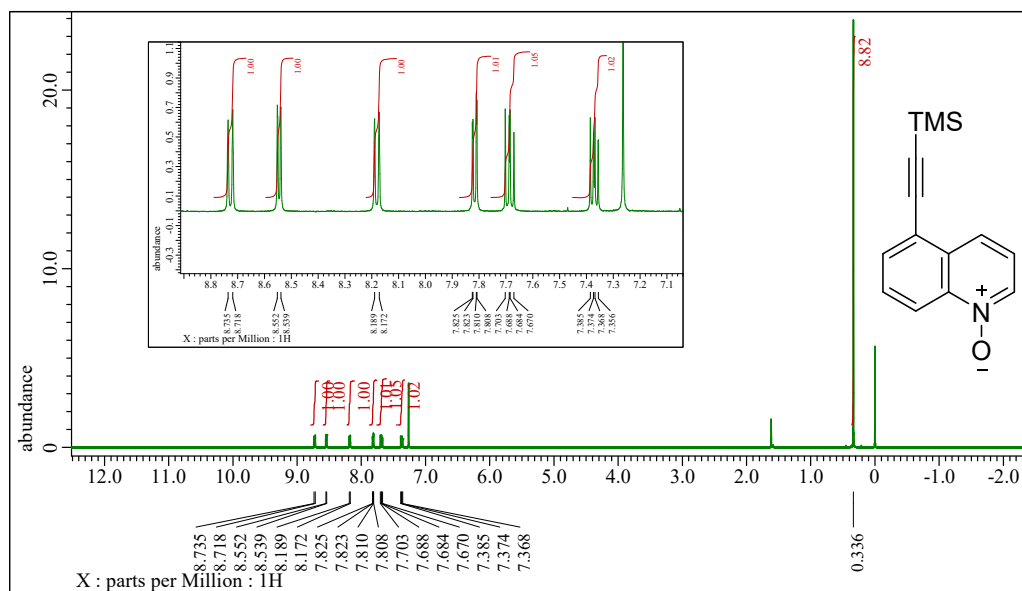

**Fig. S16** <sup>1</sup>H-NMR spectrum for 5-[2-(trimethylsilyl)ethynyl]quinoline *N*-oxide.

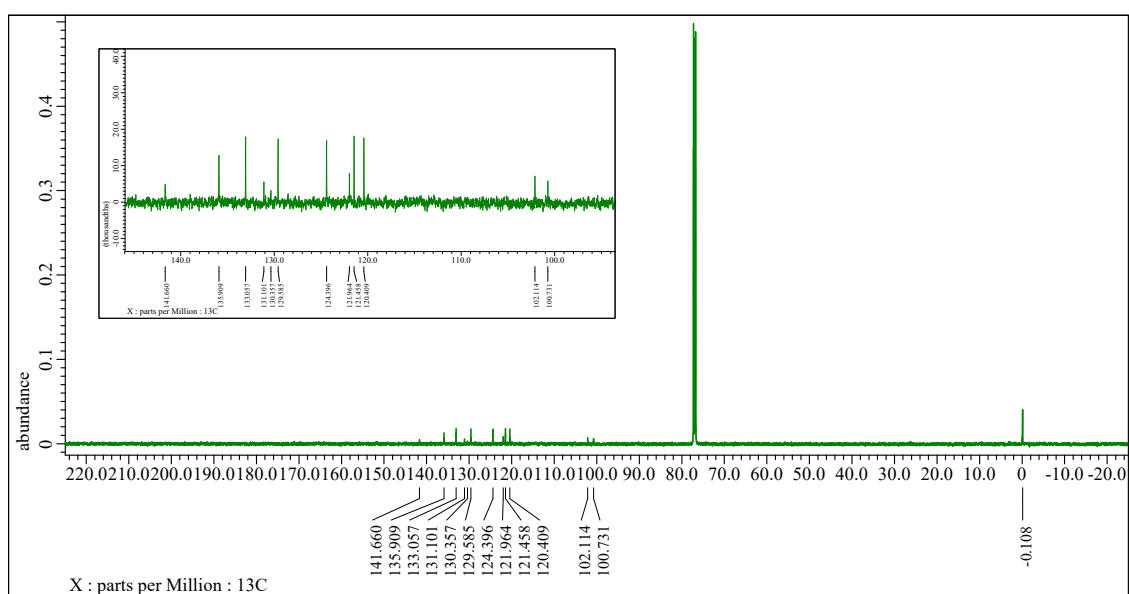

**Fig. S17** <sup>13</sup>C-NMR spectrum for 5-[2-(trimethylsilyl)ethynyl]quinoline *N*-oxide.

5. 5-[2-(Trimethylsilyl)ethynyl]-2-phenylquinoline *N*-oxide

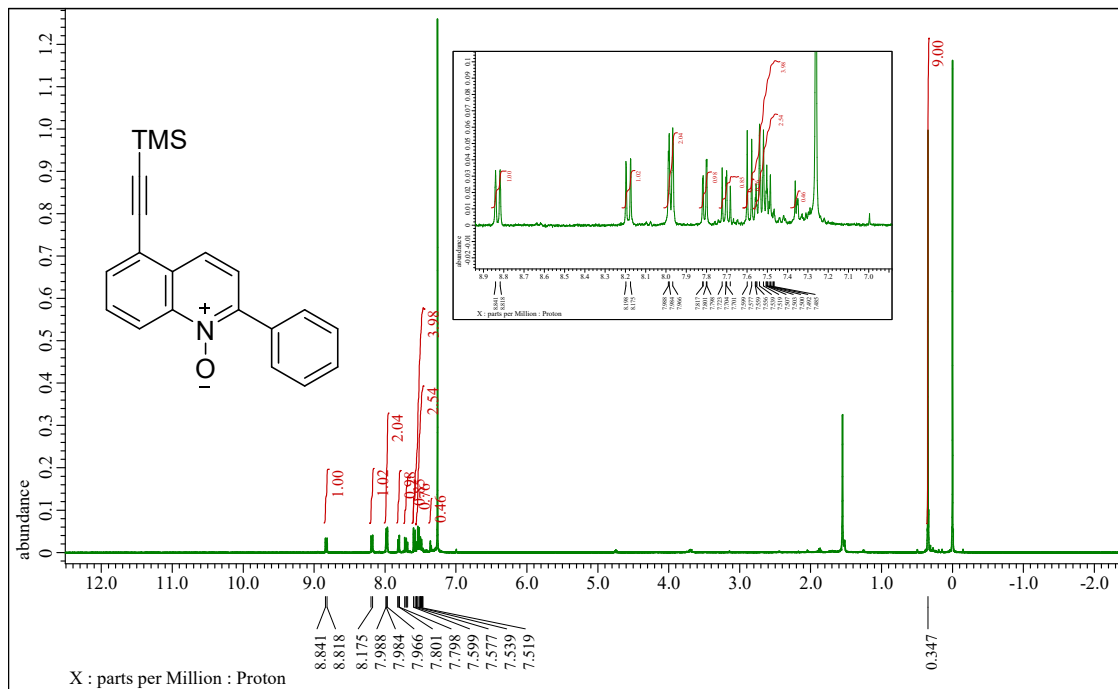

**Fig. S18** <sup>1</sup>H-NMR spectrum for 5-[2-(trimethylsilyl)ethynyl]-2-phenylquinoline *N*-oxide.

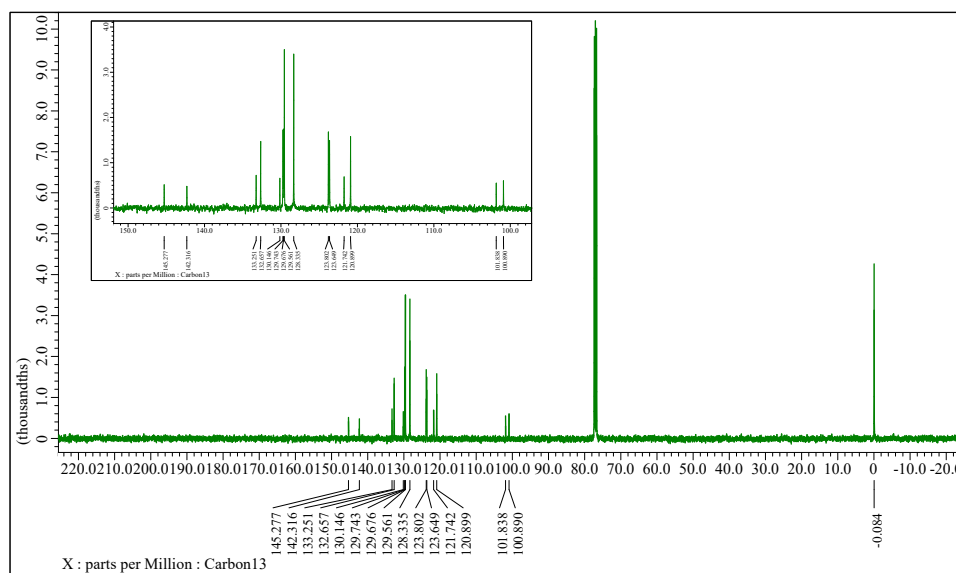

**Fig. S19** <sup>13</sup>C-NMR spectrum for 5-[2-(trimethylsilyl)ethynyl]-2-phenylquinoline *N*-oxide.



## References

- S1. G. M. Sheldrick, *Acta Crystallogr. Sect. C Struct. Chem.*, 2015, **71**, 3–8.
- S2. Bruker AXS Inc., APEX4 v2021.10-0, Madison, WI, USA, 2021.
- S3. R. R. Gupta, in *Landolt-Börnstein: Numerical Data and Functional Relationships in Science and Technology, New Series, Group II*, eds. K.-H. Hellwege and A. M. Hellwege, Springer, Berlin, Germany, 1986, pp. 4–5.
- S4. M. J. Frisch, G. W. Trucks, H. B. Schlegel, G. E. Scuseria, M. A. Robb, J. R. Cheeseman, G. Scalmani, V. Barone, G. A. Petersson, H. Nakatsuji, X. Li, C. Caricato, A. V. Marenich, J. Bloino, J. B. Janesko, R. Gomperts, B. Mennucci, H. P. Hratchian, J. V. Ortiz, A. F. Izmaylov, J. L. Sonnenberg, D. Williams-Young, F. Ding, L. Lipparini, F. Egidi, J. Goings, B. Peng, A. Petrone, T. Henderson, D. Ranasinghe, V. G. Zakrzewski, J. Gao, N. Rega, G. Zheng, W. Liang, M. Hada, M. Ehara, K. Toyota, R. Fukuda, J. Hasegawa, M. Ishida, T. Nakajima, Y. Honda, O. Kitao, H. Nakai, T. Vreven, K. Throssell, J. A. Montgomery Jr., J. E. Peralta, F. Ogliaro, M. J. Bearpark, J. J. Heyd, E. N. Brothers, K. N. Kudin, V. N. Staroverov, T. A. Keith, R. Kobayashi, J. Normand, K. Raghavachari, A. P. Rendell, J. C. Burant, S. S. Iyengar, J. Tomasi, M. Cossi, J. M. Millam, M. Klene, C. Adamo, R. Cammi, J. W. Ochterski, R. L. Martin, K. Morokuma, O. Farkas, J. B. Foresman and D. J. Fox, Gaussian 16, Revision C.01, Gaussian, Inc., Wallingford, CT, USA, 2016.
- S5. B. Ghosh, T. Antonio, J. Zhen, P. Kharkar, M. E. A. Reith and A. K. Dutta, *J. Med. Chem.*, 2010, **53**, 1023–1037.
- S6. C. Galli, *Chem. Rev.*, 1988, **88**, 765–792.
- S7. K. Sonogashira, Y. Tohda and N. Hagihara, *Tetrahedron Lett.*, 1975, **16**, 4467–4470.
- S8. E. Ochiai, *J. Org. Chem.*, 1953, **18**, 534–551.
- S9. M. Yao, H. Inoue and N. Yoshioka, *Chem. Phys. Lett.*, 2005, **402**, 11–16.
- S10. N. S. Gulykina, T. M. Dolgina, G. N. Bondarenko and I. P. Beletskaya, *Russ. J. Org. Chem.*, 2003, **39**, 797–807.
- S11. D. R. Duling, *J. Magn. Reson. B*, 1994, **104**, 105–110.
- S12. C. Berti, M. Colonna, L. Greci and L. Marchetti, *Tetrahedron*, 1976, **32**, 2147–2151.
- S13. W. Heisenberg, *Z. Phys.*, 1928, **49**, 619–636.
- S14. O. Kahn, *Molecular Magnetism*, VCH, New York, NY, USA, 1993.
- S15. (a) G. A. Baker, G. S. Rushbrooke and H. E. Gilbert, *Phys. Rev.*, 1964, **135**, A1272. (b) J. C. Bonner and M. E. Fisher, *Phys. Rev.*, 1964, **135**, A640–A658.
- S16. . Yamaguchi, F. Jensen, A. Dorigo, K. N. Houk, *Chem. Phys. Lett.* 1988, **149**, 537.
